# Supplementary material
Source: publisher site journal article supplement (https://www.dovepress.com/article/292218)

Title: Switch to autophagy the key mechanism for trabecular meshwork death in severe glaucoma.

# Supplemental Methods

Mass spectrometry methods:

Mass Spectrometric analysis of peptide mixtures

Patients were characterized into different stages as described and samples procured/stored for analysis in detail in the text (See methods). All the proteomics experiments were performed in triplicates using EASY-nLC 1000 system (Thermo Fisher Scientific) coupled to QExactive mass spectrometer (Thermo Fisher Scientific) equipped with nanoelectrospray ion source. 1μg of the peptide mixture was loaded on a precolumn and resolved using an Easy-spray LC column. The peptides were loaded with Buffer A and eluted with a 0-40% gradient of Buffer-B (95% acetonitrile/0.1%formic acid) at a flow rate of 300nl/min for 90 min.

MS data acquisition

The QExactive was operated using the Top10 HCD data-dependent acquisition mode with a full scan resolution of 70,000 at m/z 400. MS/MS scans were acquired at a resolution of 17500 at m/z 400. Lock mass option was enabled for polydimethylcyclosiloxane (PCM) ions (m/z = 445.120025) for internal recalibration during the run. MS data was acquired using a data-dependent top10 method dynamically choosing the most abundant precursor ions from the survey scan. The softwares used for analysis included the Thermo Proteome Discoverer (v2.2), Perseus (v1.6.O), STRING (Online software).

Protein identification and quantification:

The data generated was analyzed using Proteome Discoverer and was searched against Uniprot-Human database at an FDR of 1%. For Sequest HT and MS Amanda 2.0 search, the precursor and fragment mass tolerances were set at 10 ppm and 0.5 Da, respectively. The protease used to generate peptides, i.e. enzyme specificity was set for trypsin/P (cleavage at the C terminus of “K/R: unless followed by “P”) along with maximum missed cleavages value of two. Carbamidomethyl on cysteine as fixed modification and oxidation of methionine and N-terminal acetylation were considered as variable modifications for database search. Both peptide spectrum match and protein false discovery rate were set to 0.01 FDR and determined using percolator node.

Relative protein quantification of the proteins were performed using Minora feature detector node of Proteome Discoverer 2.2 with default settings and considering only high PSM (peptide spectrum matches) confidence. Based on Uniprot accession number Pfam, KEGG pathways and GO annotations were assigned for the list of identified proteins. The mass spectrometry proteomics data have been deposited to the ProteomeXchange Consortium via the PRIDE partner repository with the dataset identifier PXD010752.

A total of 1076 Proteins, 797 Protein Groups and 5511 Peptide groups were identified. To view the distribution of the result data, box and whisker plot of all stages along with their replicates based on their log transformed abundance values were plotted. These were further filtered according to the Abundances (Grouped) Counts.

Differential analysis was performed to see the degree of fold change among PAOG, PACG and Control groups. In each case, top 10 up- and down regulated protein hits were selected, showing significant fold change >= 2 or 3, taking into consideration their corresponding molecular functions, pathways and Cellular component.

Data was analysed using Perseus software (v2.2), where the absolute Abundance values were Log-2 transformed and filtered with minimum row filter <=2 at each stage. A total of 323 proteins derived out of filtering were then imputed and z-score normalized. ANOVA was accounted for Multiple-Hypothesis testing with a cut-off of 0.05, and 59 significant proteins with pvalue<0.05 were selected. A corresponding Heatmap to investigate differential expression was plotted. The up- and down-regulation of these 59 proteins at each stage was plotted together for comparative study and to get an overview of the behavior.

Further, significant apoptosis and autophagy related Proteins were picked. To get the PPI among these 59 proteins, the protein accessions were listed in Online software –STRING.

# Supplemental Appendix

List of proteins with accession numbers

| **Gene Symbol** | **Accession** | **Description** |
| --- | --- | --- |
| PURA | Q00577 | Transcriptional activator protein Pur-alpha |
| COL4A4 | P53420 | Collagen alpha-4(IV) chain |
| ITPR1 | Q14643 | Inositol 1,4,5-trisphosphate receptor type 1 |
| CBR1; SETD4 | P16152 | Carbonyl reductase [NADPH] 1 |
| NCL | P19338 | Nucleolin |
| MMP2 | P08253 | 72 kDa type IV collagenase |
| FAM129A | Q9BZQ8 | Protein Niban |
| MTCH2 | Q9Y6C9 | Mitochondrial carrier homolog 2 |
| COL4A2 | P08572 | Collagen alpha-2(IV) chain |
| FLNB | O75369 | Filamin-B |
| CYB5R1 | Q9UHQ9 | NADH-cytochrome b5 reductase 1 |
| S100A10 | P60903 | Protein S100-A10 |
| ATP5C1 | P36542 | ATP synthase subunit gamma, mitochondrial |
| CACNA2D1 | P54289 | Voltage-dependent calcium channel subunit alpha-2/delta-1 |
| AQP1 | P29972 | Aquaporin-1 |
| EEF2 | P13639 | Elongation factor 2 |
| IDH3G | P51553 | Isocitrate dehydrogenase [NAD] subunit gamma, mitochondrial |
| DNM2 | P50570 | Dynamin-2 |
| LGALS7; LGALS7B | P47929 | Galectin-7 |
| RPS2 | P15880 | 40S ribosomal protein S2 |
| MYL6 | P60660 | Myosin light polypeptide 6 |
| MFGE8 | Q08431 | Lactadherin |
| KCTD12 | Q96CX2 | BTB/POZ domain-containing protein KCTD12 |
| ACTN4 | O43707 | Alpha-actinin-4 |
| IDH2 | P48735 | Isocitrate dehydrogenase [NADP], mitochondrial |
|  | P01620 | Ig kappa chain V-III region SIE |
| ETFA | P13804 | Electron transfer flavoprotein subunit alpha, mitochondrial |
| HIST1H1C | P16403 | Histone H1.2 |
| TSPO | P30536 | Translocator protein |
| RPS4X | P62701 | 40S ribosomal protein S4, X isoform |
| FGF10 | O15520 | Fibroblast growth factor 10 |
| NDUFB1 | O75438 | NADH dehydrogenase [ubiquinone] 1 beta subcomplex subunit 1 |
| KNG1 | P01042 | Kininogen-1 |
| TF | P02787 | Serotransferrin |
| RPS14 | P62263 | 40S ribosomal protein S14 |
| SEPT7 | Q16181 | Septin-7 |
| MPC2 | O95563 | Mitochondrial pyruvate carrier 2 |
| SFXN1 | Q9H9B4 | Sideroflexin-1 |
| COL8A2 | P25067 | Collagen alpha-2(VIII) chain |
| TCF7L2 | Q9NQB0 | Transcription factor 7-like 2 |
| RPL24 | P83731 | 60S ribosomal protein L24 |
|  | P04207 | Ig kappa chain V-III region CLL |
| DLAT | P10515 | Dihydrolipoyllysine-residue acetyltransferase component of pyruvate dehydrogenase complex, mitochondrial |
| CYB5B | O43169 | Cytochrome b5 type B |
| SEMA3B | Q13214 | Semaphorin-3B |
| S100A6 | P06703 | Protein S100-A6 |
| H2AFX | P16104 | Histone H2AX |
| IGHV3-11 | P01762 | Immunoglobulin heavy variable 3-11 |
| ACTBL2 | Q562R1 | Beta-actin-like protein 2 |
| PRDX1 | Q06830 | Peroxiredoxin-1 |
| CST3 | P01034 | Cystatin-C |
| FN1 | P02751 | Fibronectin |
| UQCRC1 | P31930 | Cytochrome b-c1 complex subunit 1, mitochondrial |
| MMP12 | P39900 | Macrophage metalloelastase |
| CFH | P08603 | Complement factor H |
| HIST1H2BJ | P06899 | Histone H2B type 1-J |
| CRLF1 | O75462 | Cytokine receptor-like factor 1 |
| ORM1 | P02763 | Alpha-1-acid glycoprotein 1 |
| PPP1CB | P62140 | Serine/threonine-protein phosphatase PP1-beta catalytic subunit |
| ATP5O | P48047 | ATP synthase subunit O, mitochondrial |
| C4A; C4B | P0C0L4 | Complement C4-A |
| KRT12 | Q99456 | Keratin, type I cytoskeletal 12 |
| NPM1 | P06748 | Nucleophosmin |
| PPP6R3 | Q5H9R7 | Serine/threonine-protein phosphatase 6 regulatory subunit 3 |
| HIST2H3A; HIST2H3C; HIST2H3D | Q71DI3 | Histone H3.2 |
| CLTC | Q00610 | Clathrin heavy chain 1 |
| APOA1 | P02647 | Apolipoprotein A-I |
| TOM1L2 | Q6ZVM7 | TOM1-like protein 2 |
| FTL | P02792 | Ferritin light chain |
| OLFM1 | Q99784 | Noelin |
| KRTAP3-1 | Q9BYR8 | Keratin-associated protein 3-1 |
| VDAC3 | Q9Y277 | Voltage-dependent anion-selective channel protein 3 |
| GC | P02774 | Vitamin D-binding protein |
| APMAP | Q9HDC9 | Adipocyte plasma membrane-associated protein |
| ANXA1 | P04083 | Annexin A1 |
| APOA4 | P06727 | Apolipoprotein A-IV |
| AP2B1 | P63010 | AP-2 complex subunit beta |
| SDR39U1 | Q9NRG7 | Epimerase family protein SDR39U1 |
| CD47 | Q08722 | Leukocyte surface antigen CD47 |
| RHOB | P62745 | Rho-related GTP-binding protein RhoB |
|  | P01700 | Ig lambda chain V-I region HA |
| PDHB | P11177 | Pyruvate dehydrogenase E1 component subunit beta, mitochondrial |
| HADHB | P55084 | Trifunctional enzyme subunit beta, mitochondrial |
| FBLN1 | P23142 | Fibulin-1 |
| RPS9 | P46781 | 40S ribosomal protein S9 |
| ANGPTL7 | O43827 | Angiopoietin-related protein 7 |
| ITGAV | P06756 | Integrin alpha-V |
| TNS1 | Q9HBL0 | Tensin-1 |
| CA3 | P07451 | Carbonic anhydrase 3 |
| SERPING1 | P05155 | Plasma protease C1 inhibitor |
| STOM | P27105 | Erythrocyte band 7 integral membrane protein |
| UQCR10 | Q9UDW1 | Cytochrome b-c1 complex subunit 9 |
| PHPT1 | Q9NRX4 | 14 kDa phosphohistidine phosphatase |
| SOD2 | P04179 | Superoxide dismutase [Mn], mitochondrial |
| TUBA1B | P68363 | Tubulin alpha-1B chain |
| ATP2B4 | P23634 | Plasma membrane calcium-transporting ATPase 4 |
| EPB41L2 | O43491 | Band 4.1-like protein 2 |
| COX6A1 | P12074 | Cytochrome c oxidase subunit 6A1, mitochondrial |
| CALM3; CALM2; CALM1 | P62158 | Calmodulin |
| CCT2 | P78371 | T-complex protein 1 subunit beta |
| ARG1 | P05089 | Arginase-1 |
| PFN1 | P07737 | Profilin-1 |
| FBLN7 | Q53RD9 | Fibulin-7 |
| SEPT2 | Q15019 | Septin-2 |
| COL4A3 | Q01955 | Collagen alpha-3(IV) chain |
| PDIA3 | P30101 | Protein disulfide-isomerase A3 |
| BANF1 | O75531 | Barrier-to-autointegration factor |
| HIST1H4A; HIST1H4F; HIST1H4D; HIST1H4J; HIST2H4A; HIST2H4B; HIST1H4H; HIST1H4C; HIST4H4; HIST1H4E; HIST1H4I; HIST1H4B; HIST1H4K; HIST1H4L | P62805 | Histone H4 |
| AGT | P01019 | Angiotensinogen |
| HNRNPK | P61978 | Heterogeneous nuclear ribonucleoprotein K |
| KHDRBS1 | Q07666 | KH domain-containing, RNA-binding, signal transduction-associated protein 1 |
| CKB | P12277 | Creatine kinase B-type |
| FKBP15 | Q5T1M5 | FK506-binding protein 15 |
| RPL30 | P62888 | 60S ribosomal protein L30 |
| KIAA1199; CEMIP | Q8WUJ3 | Cell migration-inducing and hyaluronan-binding protein |
| UQCRH | P07919 | Cytochrome b-c1 complex subunit 6, mitochondrial |
| SLC4A1 | P02730 | Band 3 anion transport protein |
| DPT | Q07507 | Dermatopontin |
| PRKCDBP; CAVIN3 | Q969G5 | Protein kinase C delta-binding protein |
| DNAH17 | Q9UFH2 | Dynein heavy chain 17, axonemal |
| COX4I1 | P13073 | Cytochrome c oxidase subunit 4 isoform 1, mitochondrial |
| ATP2A2 | P16615 | Sarcoplasmic/endoplasmic reticulum calcium ATPase 2 |
| SUCLG2 | Q96I99 | Succinate--CoA ligase [GDP-forming] subunit beta, mitochondrial |
| LMNB2 | Q03252 | Lamin-B2 |
| ERLIN2 | O94905 | Erlin-2 |
| RPS23 | P62266 | 40S ribosomal protein S23 |
| NDUFA6 | P56556 | NADH dehydrogenase [ubiquinone] 1 alpha subcomplex subunit 6 |
| PGRMC1 | O00264 | Membrane-associated progesterone receptor component 1 |
| KRT15 | P19012 | Keratin, type I cytoskeletal 15 |
| CPZ | Q66K79 | Carboxypeptidase Z |
| THAP5 | Q7Z6K1 | THAP domain-containing protein 5 |
| HNRNPA2B1 | P22626 | Heterogeneous nuclear ribonucleoproteins A2/B1 |
| ELN | P15502 | Elastin |
| EPPK1 | P58107 | Epiplakin |
| PLG | P00747 | Plasminogen |
| FMOD | Q06828 | Fibromodulin |
| HRG | P04196 | Histidine-rich glycoprotein |
| F2 | P00734 | Prothrombin |
| KRT86 | O43790 | Keratin, type II cuticular Hb6 |
| APOC1 | P02654 | Apolipoprotein C-I |
| ACADVL | P49748 | Very long-chain specific acyl-CoA dehydrogenase, mitochondrial |
| EPHX1 | P07099 | Epoxide hydrolase 1 |
| ALDH2 | P05091 | Aldehyde dehydrogenase, mitochondrial |
| RPL7A | P62424 | 60S ribosomal protein L7a |
| MMP19 | Q99542 | Matrix metalloproteinase-19 |
| EMILIN1 | Q9Y6C2 | EMILIN-1 |
| TOLLIP | Q9H0E2 | Toll-interacting protein |
| PTGDS | P41222 | Prostaglandin-H2 D-isomerase |
| CAP1 | Q01518 | Adenylyl cyclase-associated protein 1 |
| CSTA | P01040 | Cystatin-A |
| HIBADH | P31937 | 3-hydroxyisobutyrate dehydrogenase, mitochondrial |
| IGKV3D-11; IGKV3-11 | P04433 | Ig kappa chain V-III region VG (Fragment) |
| LGALS3 | P17931 | Galectin-3 |
| LDHA | P00338 | L-lactate dehydrogenase A chain |
| COL1A2 | P08123 | Collagen alpha-2(I) chain |
| S100A1 | P23297 | Protein S100-A1 |
| PRKAR2A | P13861 | cAMP-dependent protein kinase type II-alpha regulatory subunit |
| CD44 | P16070 | CD44 antigen |
| HSPA1B; HSPA1A | P0DMV9 | Heat shock 70 kDa protein 1B |
| COX6C | P09669 | Cytochrome c oxidase subunit 6C |
| FBN2 | P35556 | Fibrillin-2 |
| OGDH | Q02218 | 2-oxoglutarate dehydrogenase, mitochondrial |
| ACTA2 | P62736 | Actin, aortic smooth muscle |
| SRI | P30626 | Sorcin |
| PFKM | P08237 | ATP-dependent 6-phosphofructokinase, muscle type |
|  | P01621 | Ig kappa chain V-III region NG9 (Fragment) |
| FGG | P02679 | Fibrinogen gamma chain |
| OGN | P20774 | Mimecan |
| HSD17B10 | Q99714 | 3-hydroxyacyl-CoA dehydrogenase type-2 |
| HIST1H1E | P10412 | Histone H1.4 |
| MYH9 | P35579 | Myosin-9 |
| MGP | P08493 | Matrix Gla protein |
| IGLC2 | P0CG05 | Ig lambda-2 chain C regions |
| ACAN | P16112 | Aggrecan core protein |
| CANX | P27824 | Calnexin |
| ACAT1 | P24752 | Acetyl-CoA acetyltransferase, mitochondrial |
| HTRA1 | Q92743 | Serine protease HTRA1 |
| KIF20B | Q96Q89 | Kinesin-like protein KIF20B |
| LYZ | P61626 | Lysozyme C |
| QPCT | Q16769 | Glutaminyl-peptide cyclotransferase |
| KRTAP13-2 | Q52LG2 | Keratin-associated protein 13-2 |
| CALML5 | Q9NZT1 | Calmodulin-like protein 5 |
| EIF5A | P63241 | Eukaryotic translation initiation factor 5A-1 |
| TPM1 | P09493 | Tropomyosin alpha-1 chain |
| PPIA | P62937 | Peptidyl-prolyl cis-trans isomerase A |
| ADAMTSL3 | P82987 | ADAMTS-like protein 3 |
| BCAP31 | P51572 | B-cell receptor-associated protein 31 |
| LPP | Q93052 | Lipoma-preferred partner |
| TIMP3 | P35625 | Metalloproteinase inhibitor 3 |
| ATP5A1 | P25705 | ATP synthase subunit alpha, mitochondrial |
| ATP5B | P06576 | ATP synthase subunit beta, mitochondrial |
| HIST1H3F; HIST1H3C; HIST1H3D; HIST1H3G; HIST1H3H; HIST1H3B; HIST1H3A; HIST1H3E; HIST1H3I; HIST1H3J | P68431 | Histone H3.1 |
| SRPX2 | O60687 | Sushi repeat-containing protein SRPX2 |
| C17orf47 | Q8NEP4 | Uncharacterized protein C17orf47 |
| NDUFS5 | O43920 | NADH dehydrogenase [ubiquinone] iron-sulfur protein 5 |
| C7 | P10643 | Complement component C7 |
| RPN1 | P04843 | Dolichyl-diphosphooligosaccharide--protein glycosyltransferase subunit 1 |
| DCD | P81605 | Dermcidin |
| PSME2 | Q9UL46 | Proteasome activator complex subunit 2 |
| MAMDC2 | Q7Z304 | MAM domain-containing protein 2 |
| CA2 | P00918 | Carbonic anhydrase 2 |
| TPM3 | P06753 | Tropomyosin alpha-3 chain |
| PTRF; CAVIN1 | Q6NZI2 | Polymerase I and transcript release factor |
| ITGB1 | P05556 | Integrin beta-1 |
| MAOA | P21397 | Amine oxidase [flavin-containing] A |
| KRT9 | P35527 | Keratin, type I cytoskeletal 9 |
| KRT16 | P08779 | Keratin, type I cytoskeletal 16 |
| IGHA2 | P01877 | Ig alpha-2 chain C region |
| PRDX2 | P32119 | Peroxiredoxin-2 |
| SMTN | P53814 | Smoothelin |
| DPYSL3 | Q14195 | Dihydropyrimidinase-related protein 3 |
| PTMA | P06454 | Prothymosin alpha |
| MYOC | Q99972 | Myocilin |
| DSC1 | Q08554 | Desmocollin-1 |
| RPLP2 | P05387 | 60S acidic ribosomal protein P2 |
| NCAM1 | P13591 | Neural cell adhesion molecule 1 |
| IGHV3-23 | P01764 | Immunoglobulin heavy variable 3-23 |
| DSTN | P60981 | Destrin |
| C3orf58 | Q8NDZ4 | Deleted in autism protein 1 |
| COL8A1 | P27658 | Collagen alpha-1(VIII) chain |
| ITGB5 | P18084 | Integrin beta-5 |
| ACSL1 | P33121 | Long-chain-fatty-acid--CoA ligase 1 |
| ALDH3A1 | P30838 | Aldehyde dehydrogenase, dimeric NADP-preferring |
| APOA2 | P02652 | Apolipoprotein A-II |
| OLFM3 | Q96PB7 | Noelin-3 |
| ANXA5 | P08758 | Annexin A5 |
| CRYBA1 | P05813 | Beta-crystallin A3 |
| DYNLL1 | P63167 | Dynein light chain 1, cytoplasmic |
| ITIH4 | Q14624 | Inter-alpha-trypsin inhibitor heavy chain H4 |
| CD55 | P08174 | Complement decay-accelerating factor |
| C4B; C4B_2; LOC100293534 | P0C0L5 | Complement C4-B |
| NONO | Q15233 | Non-POU domain-containing octamer-binding protein |
| C1R | P00736 | Complement C1r subcomponent |
| KRT78 | Q8N1N4 | Keratin, type II cytoskeletal 78 |
| ARL6IP5 | O75915 | PRA1 family protein 3 |
| DCT | P40126 | L-dopachrome tautomerase |
| RPS15A | P62244 | 40S ribosomal protein S15a |
| IGKV4-1 | P06312 | Immunoglobulin kappa variable 4-1 |
| COL15A1 | P39059 | Collagen alpha-1(XV) chain |
| CCT5 | P48643 | T-complex protein 1 subunit epsilon |
| FABP5 | Q01469 | Fatty acid-binding protein, epidermal |
| EHD1 | Q9H4M9 | EH domain-containing protein 1 |
| LOXL3 | P58215 | Lysyl oxidase homolog 3 |
| GNB2L1; RACK1 | P63244 | Receptor of activated protein C kinase 1 |
| AFP | P02771 | Alpha-fetoprotein |
| CLU | P10909 | Clusterin |
| SLMAP | Q14BN4 | Sarcolemmal membrane-associated protein |
| RAB1B | Q9H0U4 | Ras-related protein Rab-1B |
| GNB2 | P62879 | Guanine nucleotide-binding protein G(I)/G(S)/G(T) subunit beta-2 |
| CTSD | P07339 | Cathepsin D |
| COL6A1 | P12109 | Collagen alpha-1(VI) chain |
| CRYBB1 | P53674 | Beta-crystallin B1 |
| IDH3A | P50213 | Isocitrate dehydrogenase [NAD] subunit alpha, mitochondrial |
| AFM | P43652 | Afamin |
| KRT5 | P13647 | Keratin, type II cytoskeletal 5 |
| NPNT | Q6UXI9 | Nephronectin |
| LFNG | Q8NES3 | Beta-1,3-N-acetylglucosaminyltransferase lunatic fringe |
| LGALS3BP | Q08380 | Galectin-3-binding protein |
| ECM1 | Q16610 | Extracellular matrix protein 1 |
| RPL27A | P46776 | 60S ribosomal protein L27a |
| AGRN | O00468 | Agrin |
| TPI1 | P60174 | Triosephosphate isomerase |
| IMMT | Q16891 | MICOS complex subunit MIC60 |
| ALDH1B1 | P30837 | Aldehyde dehydrogenase X, mitochondrial |
| CTSG | P08311 | Cathepsin G |
| SIGLEC16 | A6NMB1 | Sialic acid-binding Ig-like lectin 16 |
| PRSS3P2 | Q8NHM4 | Putative trypsin-6 |
| PPBP | P02775 | Platelet basic protein |
| GPHA2 | Q96T91 | Glycoprotein hormone alpha-2 |
| HIST2H2AA4; HIST2H2AA3 | Q6FI13 | Histone H2A type 2-A |
| ECHS1 | P30084 | Enoyl-CoA hydratase, mitochondrial |
| MFAP2 | P55001 | Microfibrillar-associated protein 2 |
| YWHAE | P62258 | 14-3-3 protein epsilon |
| NOS1 | P29475 | Nitric oxide synthase, brain |
| C9 | P02748 | Complement component C9 |
| ATP5I | P56385 | ATP synthase subunit e, mitochondrial |
| CAT | P04040 | Catalase |
| CKAP4 | Q07065 | Cytoskeleton-associated protein 4 |
| HNRNPA1 | P09651 | Heterogeneous nuclear ribonucleoprotein A1 |
| LONP1 | P36776 | Lon protease homolog, mitochondrial |
| CRYAA; LOC102724652 | P02489 | Alpha-crystallin A chain |
| PSAP | P07602 | Prosaposin |
| COL28A1 | Q2UY09 | Collagen alpha-1(XXVIII) chain |
| PDLIM7 | Q9NR12 | PDZ and LIM domain protein 7 |
| TRPM6 | Q9BX84 | Transient receptor potential cation channel subfamily M member 6 |
|  | P06310 | Ig kappa chain V-II region RPMI 6410 |
| TMEM109 | Q9BVC6 | Transmembrane protein 109 |
| NDUFV2 | P19404 | NADH dehydrogenase [ubiquinone] flavoprotein 2, mitochondrial |
| TAGLN2 | P37802 | Transgelin-2 |
| METTL7A | Q9H8H3 | Methyltransferase-like protein 7A |
| RPS16 | P62249 | 40S ribosomal protein S16 |
| FLNC | Q14315 | Filamin-C |
| PARK7 | Q99497 | Protein deglycase DJ-1 |
| SBSPON | Q8IVN8 | Somatomedin-B and thrombospondin type-1 domain-containing protein |
| COX6B1 | P14854 | Cytochrome c oxidase subunit 6B1 |
| SLC25A3 | Q00325 | Phosphate carrier protein, mitochondrial |
| CALR | P27797 | Calreticulin |
| TXNDC5 | Q8NBS9 | Thioredoxin domain-containing protein 5 |
| NME2; NME1-NME2 | P22392 | Nucleoside diphosphate kinase B |
| SEPT9 | Q9UHD8 | Septin-9 |
| C14orf2 | P56378 | 6.8 kDa mitochondrial proteolipid |
| ORM2 | P19652 | Alpha-1-acid glycoprotein 2 |
| FBN1 | P35555 | Fibrillin-1 |
| GPHB5 | Q86YW7 | Glycoprotein hormone beta-5 |
| PYGL | P06737 | Glycogen phosphorylase, liver form |
| NTN4 | Q9HB63 | Netrin-4 |
| KRT13 | P13646 | Keratin, type I cytoskeletal 13 |
| PDCD6 | O75340 | Programmed cell death protein 6 |
| PLS3 | P13797 | Plastin-3 |
| SUCLA2 | Q9P2R7 | Succinate--CoA ligase [ADP-forming] subunit beta, mitochondrial |
| HSPA9 | P38646 | Stress-70 protein, mitochondrial |
| ENO1 | P06733 | Alpha-enolase |
| RAC1 | P63000 | Ras-related C3 botulinum toxin substrate 1 |
| HSPD1 | P10809 | 60 kDa heat shock protein, mitochondrial |
| SERPINE2 | P07093 | Glia-derived nexin |
| KRT17 | Q04695 | Keratin, type I cytoskeletal 17 |
| NDUFS7 | O75251 | NADH dehydrogenase [ubiquinone] iron-sulfur protein 7, mitochondrial |
| SERPINA3 | P01011 | Alpha-1-antichymotrypsin |
| CYC1 | P08574 | Cytochrome c1, heme protein, mitochondrial |
| THY1 | P04216 | Thy-1 membrane glycoprotein |
| CYB5R3 | P00387 | NADH-cytochrome b5 reductase 3 |
| RPL7 | P18124 | 60S ribosomal protein L7 |
| HNRNPM | P52272 | Heterogeneous nuclear ribonucleoprotein M |
| GAL3ST1 | Q99999 | Galactosylceramide sulfotransferase |
| CYTL1 | Q9NRR1 | Cytokine-like protein 1 |
| COL12A1 | Q99715 | Collagen alpha-1(XII) chain |
| FTH1 | P02794 | Ferritin heavy chain |
| CKMT1B; CKMT1A | P12532 | Creatine kinase U-type, mitochondrial |
| BLMH | Q13867 | Bleomycin hydrolase |
| CNN3 | Q15417 | Calponin-3 |
| S100A11 | P31949 | Protein S100-A11 |
| SOD3 | P08294 | Extracellular superoxide dismutase [Cu-Zn] |
| SERPINF1 | P36955 | Pigment epithelium-derived factor |
| C8A | P07357 | Complement component C8 alpha chain |
| RPL15 | P61313 | 60S ribosomal protein L15 |
| LTF | P02788 | Lactotransferrin |
| FLJ45256; LOC400511; LINC01567 | Q6ZSR6 | Putative uncharacterized protein FLJ45256 |
| HSPB6 | O14558 | Heat shock protein beta-6 |
| HLA-DRB4; HLA-DRB1 | P13760 | HLA class II histocompatibility antigen, DRB1-4 beta chain |
| NDUFB4 | O95168 | NADH dehydrogenase [ubiquinone] 1 beta subcomplex subunit 4 |
| ITIH1 | P19827 | Inter-alpha-trypsin inhibitor heavy chain H1 |
| SERPINB9 | P50453 | Serpin B9 |
| LOC440786 | P01617 | Ig kappa chain V-II region TEW |
| STAB1 | Q9NY15 | Stabilin-1 |
| NDUFB10 | O96000 | NADH dehydrogenase [ubiquinone] 1 beta subcomplex subunit 10 |
| GSTP1 | P09211 | Glutathione S-transferase P |
| EIF4A2 | Q14240 | Eukaryotic initiation factor 4A-II |
| ACTG1 | P63261 | Actin, cytoplasmic 2 |
| MYH14 | Q7Z406 | Myosin-14 |
| APOE | P02649 | Apolipoprotein E |
| S100A2 | P29034 | Protein S100-A2 |
| COPA | P53621 | Coatomer subunit alpha |
| S100B | P04271 | Protein S100-B |
| IGHG3 | P01860 | Ig gamma-3 chain C region |
| APOH | P02749 | Beta-2-glycoprotein 1 |
| IGHV4-39 | P01824 | Immunoglobulin heavy variable 4-39 |
| ACO2 | Q99798 | Aconitate hydratase, mitochondrial |
| SERPINH1 | P50454 | Serpin H1 |
| IGJ; JCHAIN | P01591 | Immunoglobulin J chain |
| SUN2 | Q9UH99 | SUN domain-containing protein 2 |
| DDX39B | Q13838 | Spliceosome RNA helicase DDX39B |
| PGRMC2 | O15173 | Membrane-associated progesterone receptor component 2 |
| NDUFA9 | Q16795 | NADH dehydrogenase [ubiquinone] 1 alpha subcomplex subunit 9, mitochondrial |
| BPGM | P07738 | Bisphosphoglycerate mutase |
| GNA11 | P29992 | Guanine nucleotide-binding protein subunit alpha-11 |
| DEFA1; DEFA1B | P59665 | Neutrophil defensin 1 |
| C1QTNF3 | Q9BXJ4 | Complement C1q tumor necrosis factor-related protein 3 |
| MPZ | P25189 | Myelin protein P0 |
| HPX | P02790 | Hemopexin |
| CCT3 | P49368 | T-complex protein 1 subunit gamma |
| CRYAB | P02511 | Alpha-crystallin B chain |
| SLC25A11 | Q02978 | Mitochondrial 2-oxoglutarate/malate carrier protein |
| FCGBP | Q9Y6R7 | IgGFc-binding protein |
| PKM | P14618 | Pyruvate kinase PKM |
| ATP2A1 | O14983 | Sarcoplasmic/endoplasmic reticulum calcium ATPase 1 |
| NID1 | P14543 | Nidogen-1 |
| SCN2B | O60939 | Sodium channel subunit beta-2 |
| ILK | Q13418 | Integrin-linked protein kinase |
| SPTBN1 | Q01082 | Spectrin beta chain, non-erythrocytic 1 |
| COL16A1 | Q07092 | Collagen alpha-1(XVI) chain |
| CAPZB | P47756 | F-actin-capping protein subunit beta |
| TXN | P10599 | Thioredoxin |
| WDR1 | O75083 | WD repeat-containing protein 1 |
| ACTR3 | P61158 | Actin-related protein 3 |
| EHD2 | Q9NZN4 | EH domain-containing protein 2 |
| HP1BP3 | Q5SSJ5 | Heterochromatin protein 1-binding protein 3 |
| TTR | P02766 | Transthyretin |
| OLFML1 | Q6UWY5 | Olfactomedin-like protein 1 |
| PALLD | Q8WX93 | Palladin |
| MYO1D | O94832 | Unconventional myosin-Id |
| C8G | P07360 | Complement component C8 gamma chain |
| KRT4 | P19013 | Keratin, type II cytoskeletal 4 |
| PPIB | P23284 | Peptidyl-prolyl cis-trans isomerase B |
| CFB | P00751 | Complement factor B |
| COL14A1 | Q05707 | Collagen alpha-1(XIV) chain |
| WNT5A | P41221 | Protein Wnt-5a |
| TUBB | P07437 | Tubulin beta chain |
| PGLS | O95336 | 6-phosphogluconolactonase |
| JUP | P14923 | Junction plakoglobin |
| ALDH1A1 | P00352 | Retinal dehydrogenase 1 |
| TGFB1I1 | O43294 | Transforming growth factor beta-1-induced transcript 1 protein |
| LAMP1 | P11279 | Lysosome-associated membrane glycoprotein 1 |
| DLST | P36957 | Dihydrolipoyllysine-residue succinyltransferase component of 2-oxoglutarate dehydrogenase complex, mitochondrial |
| COL3A1 | P02461 | Collagen alpha-1(III) chain |
| NOG | Q13253 | Noggin |
| HSPG2 | P98160 | Basement membrane-specific heparan sulfate proteoglycan core protein |
| PRELP | P51888 | Prolargin |
| ARPC4 | P59998 | Actin-related protein 2/3 complex subunit 4 |
| VAT1 | Q99536 | Synaptic vesicle membrane protein VAT-1 homolog |
| RPL6 | Q02878 | 60S ribosomal protein L6 |
| TGFBI | Q15582 | Transforming growth factor-beta-induced protein ig-h3 |
| TUBB4A | P04350 | Tubulin beta-4A chain |
| KANK1 | Q14678 | KN motif and ankyrin repeat domain-containing protein 1 |
| CPNE1 | Q99829 | Copine-1 |
| KRT19 | P08727 | Keratin, type I cytoskeletal 19 |
| GNAI2 | P04899 | Guanine nucleotide-binding protein G(i) subunit alpha-2 |
| ALDOC | P09972 | Fructose-bisphosphate aldolase C |
| BCAM | P50895 | Basal cell adhesion molecule |
| EGFL7 | Q9UHF1 | Epidermal growth factor-like protein 7 |
| AKR1C2 | P52895 | Aldo-keto reductase family 1 member C2 |
| CAPZA2 | P47755 | F-actin-capping protein subunit alpha-2 |
| COX7C | P15954 | Cytochrome c oxidase subunit 7C, mitochondrial |
| DPYSL2 | Q16555 | Dihydropyrimidinase-related protein 2 |
| RPS10 | P46783 | 40S ribosomal protein S10 |
| TUBB3 | Q13509 | Tubulin beta-3 chain |
| IGHA1 | P01876 | Ig alpha-1 chain C region |
| HSPB1 | P04792 | Heat shock protein beta-1 |
| EFEMP2 | O95967 | EGF-containing fibulin-like extracellular matrix protein 2 |
| CPNE3 | O75131 | Copine-3 |
| CRTAC1 | Q9NQ79 | Cartilage acidic protein 1 |
| BLVRB | P30043 | Flavin reductase (NADPH) |
| PDLIM5 | Q96HC4 | PDZ and LIM domain protein 5 |
| SPEN | Q96T58 | Msx2-interacting protein |
| KRT14 | P02533 | Keratin, type I cytoskeletal 14 |
| FERMT2 | Q96AC1 | Fermitin family homolog 2 |
| PDHA1 | P08559 | Pyruvate dehydrogenase E1 component subunit alpha, somatic form, mitochondrial |
| MFAP4 | P55083 | Microfibril-associated glycoprotein 4 |
| LAMA5 | O15230 | Laminin subunit alpha-5 |
| HRNR | Q86YZ3 | Hornerin |
| MVP | Q14764 | Major vault protein |
| TMSB4X | P62328 | Thymosin beta-4 |
| CXCL14 | O95715 | C-X-C motif chemokine 14 |
| CST4 | P01036 | Cystatin-S |
| KRT31 | Q15323 | Keratin, type I cuticular Ha1 |
| MYLK | Q15746 | Myosin light chain kinase, smooth muscle |
| H2AFY2 | Q9P0M6 | Core histone macro-H2A.2 |
| ZKSCAN5 | Q9Y2L8 | Zinc finger protein with KRAB and SCAN domains 5 |
| KRT24 | Q2M2I5 | Keratin, type I cytoskeletal 24 |
| PRPH | P41219 | Peripherin |
| OLFML3 | Q9NRN5 | Olfactomedin-like protein 3 |
| CRYBA4 | P53673 | Beta-crystallin A4 |
| UQCRB | P14927 | Cytochrome b-c1 complex subunit 7 |
| SERPIND1 | P05546 | Heparin cofactor 2 |
| GPNMB | Q14956 | Transmembrane glycoprotein NMB |
| KERA | O60938 | Keratocan |
| HBG1 | P69891 | Hemoglobin subunit gamma-1 |
| COCH | O43405 | Cochlin |
| ADH5 | P11766 | Alcohol dehydrogenase class-3 |
| GPI | P06744 | Glucose-6-phosphate isomerase |
| KRT10 | P13645 | Keratin, type I cytoskeletal 10 |
| SLPI | P03973 | Antileukoproteinase |
| TMEM43 | Q9BTV4 | Transmembrane protein 43 |
| S100A8 | P05109 | Protein S100-A8 |
| RPS27A | P62979 | Ubiquitin-40S ribosomal protein S27a |
| KRT1 | P04264 | Keratin, type II cytoskeletal 1 |
| RPL4 | P36578 | 60S ribosomal protein L4 |
| RPLP1 | P05386 | 60S acidic ribosomal protein P1 |
| MAOB | P27338 | Amine oxidase [flavin-containing] B |
| RPS18 | P62269 | 40S ribosomal protein S18 |
| GNAS | Q5JWF2 | Guanine nucleotide-binding protein G(s) subunit alpha isoforms XLas |
| AP2M1 | Q96CW1 | AP-2 complex subunit mu |
| ARPC3 | O15145 | Actin-related protein 2/3 complex subunit 3 |
| SNTB2 | Q13425 | Beta-2-syntrophin |
| NDUFB9 | Q9Y6M9 | NADH dehydrogenase [ubiquinone] 1 beta subcomplex subunit 9 |
| LAMB1 | P07942 | Laminin subunit beta-1 |
| CRYGD | P07320 | Gamma-crystallin D |
| PHGDH | O43175 | D-3-phosphoglycerate dehydrogenase |
| GNAO1 | P09471 | Guanine nucleotide-binding protein G(o) subunit alpha |
| IGHG2 | P01859 | Ig gamma-2 chain C region |
| ANXA11 | P50995 | Annexin A11 |
| CRYGS | P22914 | Beta-crystallin S |
| CHADL | Q6NUI6 | Chondroadherin-like protein |
| SNRPD1 | P62314 | Small nuclear ribonucleoprotein Sm D1 |
| S100A7 | P31151 | Protein S100-A7 |
| IDH1 | O75874 | Isocitrate dehydrogenase [NADP] cytoplasmic |
| APCS | P02743 | Serum amyloid P-component |
| AHSG | P02765 | Alpha-2-HS-glycoprotein |
| IGKC | P01834 | Ig kappa chain C region |
| HP | P00738 | Haptoglobin |
| MYH10 | P35580 | Myosin-10 |
| ARF4 | P18085 | ADP-ribosylation factor 4 |
| TLN1 | Q9Y490 | Talin-1 |
| COL18A1 | P39060 | Collagen alpha-1(XVIII) chain |
| RAB14 | P61106 | Ras-related protein Rab-14 |
| FLNA | P21333 | Filamin-A |
| COX2 | P00403 | Cytochrome c oxidase subunit 2 |
| CCL18; LOC101060271 | P55774 | C-C motif chemokine 18 |
| KRT2 | P35908 | Keratin, type II cytoskeletal 2 epidermal |
|  | P80748 | Ig lambda chain V-III region LOI |
| ANXA6 | P08133 | Annexin A6 |
| H1F0 | P07305 | Histone H1.0 |
| H3F3A; H3F3AP4; H3F3B | P84243 | Histone H3.3 |
| SDHB | P21912 | Succinate dehydrogenase [ubiquinone] iron-sulfur subunit, mitochondrial |
| MYL9 | P24844 | Myosin regulatory light polypeptide 9 |
| MYOF | Q9NZM1 | Myoferlin |
| COL4A1 | P02462 | Collagen alpha-1(IV) chain |
| C1QC | P02747 | Complement C1q subcomponent subunit C |
| HBE1 | P02100 | Hemoglobin subunit epsilon |
| TINAGL1 | Q9GZM7 | Tubulointerstitial nephritis antigen-like |
| AMBP | P02760 | Protein AMBP |
| MYO1C | O00159 | Unconventional myosin-Ic |
| MRVI1 | Q9Y6F6 | Protein MRVI1 |
| C5 | P01031 | Complement C5 |
| NDUFS8 | O00217 | NADH dehydrogenase [ubiquinone] iron-sulfur protein 8, mitochondrial |
| RNASE3 | P12724 | Eosinophil cationic protein |
| BMP3 | P12645 | Bone morphogenetic protein 3 |
| APOC2 | P02655 | Apolipoprotein C-II |
| TNFSF13 | O75888 | Tumor necrosis factor ligand superfamily member 13 |
| C6 | P13671 | Complement component C6 |
| ATP5L | O75964 | ATP synthase subunit g, mitochondrial |
|  | P01606 | Ig kappa chain V-I region OU |
| SPARCL1 | Q14515 | SPARC-like protein 1 |
| GPD2 | P43304 | Glycerol-3-phosphate dehydrogenase, mitochondrial |
| LCN2 | P80188 | Neutrophil gelatinase-associated lipocalin |
| ALDOA | P04075 | Fructose-bisphosphate aldolase A |
| KCNH7 | Q9NS40 | Potassium voltage-gated channel subfamily H member 7 |
| CAPNS1 | P04632 | Calpain small subunit 1 |
| YWHAZ | P63104 | 14-3-3 protein zeta/delta |
| LAMA4 | Q16363 | Laminin subunit alpha-4 |
| MURC; CAVIN4 | Q5BKX8 | Muscle-related coiled-coil protein |
| NDUFA8 | P51970 | NADH dehydrogenase [ubiquinone] 1 alpha subcomplex subunit 8 |
| AOC3 | Q16853 | Membrane primary amine oxidase |
| ALMS1 | Q8TCU4 | Alstrom syndrome protein 1 |
| MST1L | Q2TV78 | Putative macrophage stimulating 1-like protein |
| SELENBP1 | Q13228 | Selenium-binding protein 1 |
| CASP14 | P31944 | Caspase-14 |
| IGHV1-69 | P01742 | Immunoglobulin heavy variable 1-69 |
| SUCLG1 | P53597 | Succinate--CoA ligase [ADP/GDP-forming] subunit alpha, mitochondrial |
| IL17D | Q8TAD2 | Interleukin-17D |
| HBA2; HBA1 | P69905 | Hemoglobin subunit alpha |
|  | P01714 | Ig lambda chain V-III region SH |
| CRYBB2 | P43320 | Beta-crystallin B2 |
| RPL3 | P39023 | 60S ribosomal protein L3 |
| NDUFA5 | Q16718 | NADH dehydrogenase [ubiquinone] 1 alpha subcomplex subunit 5 |
|  | P01613 | Ig kappa chain V-I region Ni |
| ATP5F1 | P24539 | ATP synthase F(0) complex subunit B1, mitochondrial |
| ALDH7A1 | P49419 | Alpha-aminoadipic semialdehyde dehydrogenase |
| IGHG1 | P01857 | Ig gamma-1 chain C region |
| HBD | P02042 | Hemoglobin subunit delta |
| KPNB1 | Q14974 | Importin subunit beta-1 |
| HK1 | P19367 | Hexokinase-1 |
| CCT4 | P50991 | T-complex protein 1 subunit delta |
| SLC25A6 | P12236 | ADP/ATP translocase 3 |
| LGALS1 | P09382 | Galectin-1 |
| VIM | P08670 | Vimentin |
| FAM86A; EEF2KMT | Q96G04 | Protein-lysine N-methyltransferase EEF2KMT |
| HSP90AA1 | P07900 | Heat shock protein HSP 90-alpha |
| ALB | P02768 | Serum albumin |
| TUBB2A | Q13885 | Tubulin beta-2A chain |
| VCL | P18206 | Vinculin |
| SFN | P31947 | 14-3-3 protein sigma |
| NDUFA4 | O00483 | Cytochrome c oxidase subunit NDUFA4 |
| PRPS2 | P11908 | Ribose-phosphate pyrophosphokinase 2 |
| CD81 | P60033 | CD81 antigen |
| VTN | P04004 | Vitronectin |
| VCP | P55072 | Transitional endoplasmic reticulum ATPase |
| KRT73 | Q86Y46 | Keratin, type II cytoskeletal 73 |
| DCN | P07585 | Decorin |
| GGT5 | P36269 | Gamma-glutamyltransferase 5 |
| WNT6 | Q9Y6F9 | Protein Wnt-6 |
| COL6A2 | P12110 | Collagen alpha-2(VI) chain |
| OPTC | Q9UBM4 | Opticin |
| SAMHD1 | Q9Y3Z3 | Deoxynucleoside triphosphate triphosphohydrolase SAMHD1 |
| IGHG4 | P01861 | Ig gamma-4 chain C region |
| ANGPTL5 | Q86XS5 | Angiopoietin-related protein 5 |
| HNRNPA3 | P51991 | Heterogeneous nuclear ribonucleoprotein A3 |
| NDUFS1 | P28331 | NADH-ubiquinone oxidoreductase 75 kDa subunit, mitochondrial |
| ADH1B | P00325 | Alcohol dehydrogenase 1B |
| NDUFS4 | O43181 | NADH dehydrogenase [ubiquinone] iron-sulfur protein 4, mitochondrial |
| RPSA | P08865 | 40S ribosomal protein SA |
| DES | P17661 | Desmin |
| SRPX | P78539 | Sushi repeat-containing protein SRPX |
| LCN1 | P31025 | Lipocalin-1 |
| THBS1 | P07996 | Thrombospondin-1 |
|  | P04220 | Ig mu heavy chain disease protein |
| ABI3BP | Q7Z7G0 | Target of Nesh-SH3 |
| PGAM1; LOC643576 | P18669 | Phosphoglycerate mutase 1 |
| LAMC2 | Q13753 | Laminin subunit gamma-2 |
| HIST1H2AB; HIST1H2AE | P04908 | Histone H2A type 1-B/E |
| CXCL12 | P48061 | Stromal cell-derived factor 1 |
| CNN1 | P51911 | Calponin-1 |
| CPB2 | Q96IY4 | Carboxypeptidase B2 |
| MIF | P14174 | Macrophage migration inhibitory factor |
| TOM1 | O60784 | Target of Myb protein 1 |
| GSR | P00390 | Glutathione reductase, mitochondrial |
| COMT | P21964 | Catechol O-methyltransferase |
| CSRP1 | P21291 | Cysteine and glycine-rich protein 1 |
| TUFM | P49411 | Elongation factor Tu, mitochondrial |
| GLUD1 | P00367 | Glutamate dehydrogenase 1, mitochondrial |
| C1QB | P02746 | Complement C1q subcomponent subunit B |
| DDTL | A6NHG4 | D-dopachrome decarboxylase-like protein |
| S100A4 | P26447 | Protein S100-A4 |
| AHNAK | Q09666 | Neuroblast differentiation-associated protein AHNAK |
| PCBP2 | Q15366 | Poly(rC)-binding protein 2 |
| AZGP1 | P25311 | Zinc-alpha-2-glycoprotein |
| PRDM1 | O75626 | PR domain zinc finger protein 1 |
| TUBA1A | Q71U36 | Tubulin alpha-1A chain |
| EZR | P15311 | Ezrin |
| SEPP1; SELENOP | P49908 | Selenoprotein P |
| HSPA8 | P11142 | Heat shock cognate 71 kDa protein |
| CNP | P09543 | 2',3'-cyclic-nucleotide 3'-phosphodiesterase |
| ASPH | Q12797 | Aspartyl/asparaginyl beta-hydroxylase |
| GSN | P06396 | Gelsolin |
| RNASE4 | P34096 | Ribonuclease 4 |
| MARCO | Q9UEW3 | Macrophage receptor MARCO |
| A2M | P01023 | Alpha-2-macroglobulin |
| HIST1H2BK | O60814 | Histone H2B type 1-K |
| GRN | P28799 | Granulins |
| RPL28 | P46779 | 60S ribosomal protein L28 |
| S100A9 | P06702 | Protein S100-A9 |
| FAM162A | Q96A26 | Protein FAM162A |
| PPP2R1A | P30153 | Serine/threonine-protein phosphatase 2A 65 kDa regulatory subunit A alpha isoform |
| AP2A1 | O95782 | AP-2 complex subunit alpha-1 |
| VDAC1 | P21796 | Voltage-dependent anion-selective channel protein 1 |
| CFL1 | P23528 | Cofilin-1 |
| ACTN1 | P12814 | Alpha-actinin-1 |
| PF4V1 | P10720 | Platelet factor 4 variant |
| COL10A1 | Q03692 | Collagen alpha-1(X) chain |
| DSP | P15924 | Desmoplakin |
| PLA2G2A | P14555 | Phospholipase A2, membrane associated |
| RPL18A | Q02543 | 60S ribosomal protein L18a |
| NDUFA2 | O43678 | NADH dehydrogenase [ubiquinone] 1 alpha subcomplex subunit 2 |
| ATP5H | O75947 | ATP synthase subunit d, mitochondrial |
| SLC25A12 | O75746 | Calcium-binding mitochondrial carrier protein Aralar1 |
| IDH3B | O43837 | Isocitrate dehydrogenase [NAD] subunit beta, mitochondrial |
| FGB | P02675 | Fibrinogen beta chain |
| CD9 | P21926 | CD9 antigen |
| MSN | P26038 | Moesin |
| RAP1BL | A6NIZ1 | Ras-related protein Rap-1b-like protein |
| ZNF251 | Q9BRH9 | Zinc finger protein 251 |
| TNXB | P22105 | Tenascin-X |
| MAPK1 | P28482 | Mitogen-activated protein kinase 1 |
| PGK1 | P00558 | Phosphoglycerate kinase 1 |
| ANXA7 | P20073 | Annexin A7 |
| BMPER | Q8N8U9 | BMP-binding endothelial regulator protein |
| PRDX3 | P30048 | Thioredoxin-dependent peroxide reductase, mitochondrial |
| COL5A2 | P05997 | Collagen alpha-2(V) chain |
| RPL18 | Q07020 | 60S ribosomal protein L18 |
| CDC42 | P60953 | Cell division control protein 42 homolog |
| SDHA | P31040 | Succinate dehydrogenase [ubiquinone] flavoprotein subunit, mitochondrial |
| RPS3 | P23396 | 40S ribosomal protein S3 |
| HIGD1A | Q9Y241 | HIG1 domain family member 1A, mitochondrial |
| SLC25A4 | P12235 | ADP/ATP translocase 1 |
| APOL2 | Q9BQE5 | Apolipoprotein L2 |
| PCYOX1 | Q9UHG3 | Prenylcysteine oxidase 1 |
| ANXA2 | P07355 | Annexin A2 |
| ASPN | Q9BXN1 | Asporin |
| HADHA | P40939 | Trifunctional enzyme subunit alpha, mitochondrial |
| PCBP1 | Q15365 | Poly(rC)-binding protein 1 |
| CA1 | P00915 | Carbonic anhydrase 1 |
| LMNA | P02545 | Prelamin-A/C |
| GAPDH | P04406 | Glyceraldehyde-3-phosphate dehydrogenase |
| GSTM1 | P09488 | Glutathione S-transferase Mu 1 |
| KRT3 | P12035 | Keratin, type II cytoskeletal 3 |
| YWHAG | P61981 | 14-3-3 protein gamma |
| CPXM2 | Q8N436 | Inactive carboxypeptidase-like protein X2 |
| UQCRC2 | P22695 | Cytochrome b-c1 complex subunit 2, mitochondrial |
| PMEL | P40967 | Melanocyte protein PMEL |
| HSPA5 | P11021 | 78 kDa glucose-regulated protein |
| SEC23A | Q15436 | Protein transport protein Sec23A |
| NDUFS3 | O75489 | NADH dehydrogenase [ubiquinone] iron-sulfur protein 3, mitochondrial |
| HLA-DRA | P01903 | HLA class II histocompatibility antigen, DR alpha chain |
| PHB | P35232 | Prohibitin |
| PPM1G | O15355 | Protein phosphatase 1G |
| SYNCRIP | O60506 | Heterogeneous nuclear ribonucleoprotein Q |
| PEBP1 | P30086 | Phosphatidylethanolamine-binding protein 1 |
| EEF1A1 | P68104 | Elongation factor 1-alpha 1 |
| YBX2 | Q9Y2T7 | Y-box-binding protein 2 |
| RSPO4 | Q2I0M5 | R-spondin-4 |
| NDUFS2 | O75306 | NADH dehydrogenase [ubiquinone] iron-sulfur protein 2, mitochondrial |
| PSMA8 | Q8TAA3 | Proteasome subunit alpha type-7-like |
| ACTB | P60709 | Actin, cytoplasmic 1 |
| HNRNPU | Q00839 | Heterogeneous nuclear ribonucleoprotein U |
| LDHB | P07195 | L-lactate dehydrogenase B chain |
| EFEMP1 | Q12805 | EGF-containing fibulin-like extracellular matrix protein 1 |
| C8B | P07358 | Complement component C8 beta chain |
| RSPO2 | Q6UXX9 | R-spondin-2 |
| SORBS2 | O94875 | Sorbin and SH3 domain-containing protein 2 |
| GPX3 | P22352 | Glutathione peroxidase 3 |
| SPTAN1 | Q13813 | Spectrin alpha chain, non-erythrocytic 1 |
| DKK2 | Q9UBU2 | Dickkopf-related protein 2 |
| RAB7A | P51149 | Ras-related protein Rab-7a |
| LTBP2 | Q14767 | Latent-transforming growth factor beta-binding protein 2 |
| AHSP | Q9NZD4 | Alpha-hemoglobin-stabilizing protein |
| WNT5B | Q9H1J7 | Protein Wnt-5b |
| TPM4 | P67936 | Tropomyosin alpha-4 chain |
| SERPINB12 | Q96P63 | Serpin B12 |
| COX5A | P20674 | Cytochrome c oxidase subunit 5A, mitochondrial |
| GNB1 | P62873 | Guanine nucleotide-binding protein G(I)/G(S)/G(T) subunit beta-1 |
| SOD1 | P00441 | Superoxide dismutase [Cu-Zn] |
| ITGA7 | Q13683 | Integrin alpha-7 |
| THBS4 | P35443 | Thrombospondin-4 |
| PRDX6 | P30041 | Peroxiredoxin-6 |
| PLEC | Q15149 | Plectin |
| COL1A1 | P02452 | Collagen alpha-1(I) chain |
| COL6A3 | P12111 | Collagen alpha-3(VI) chain |
| COX5B | P10606 | Cytochrome c oxidase subunit 5B, mitochondrial |
| VWA1 | Q6PCB0 | von Willebrand factor A domain-containing protein 1 |
| RPL10 | P27635 | 60S ribosomal protein L10 |
| GANAB | Q14697 | Neutral alpha-glucosidase AB |
| AEBP1 | Q8IUX7 | Adipocyte enhancer-binding protein 1 |
| FGA | P02671 | Fibrinogen alpha chain |
| GSTM3 | P21266 | Glutathione S-transferase Mu 3 |
| HSD17B12 | Q53GQ0 | Very-long-chain 3-oxoacyl-CoA reductase |
| NDUFV1 | P49821 | NADH dehydrogenase [ubiquinone] flavoprotein 1, mitochondrial |
| HSPA2 | P54652 | Heat shock-related 70 kDa protein 2 |
| MUCL1 | Q96DR8 | Mucin-like protein 1 |
| FRMPD1 | Q5SYB0 | FERM and PDZ domain-containing protein 1 |
| CAPN2 | P17655 | Calpain-2 catalytic subunit |
| MYL12B; MYL12A | O14950 | Myosin regulatory light chain 12B |
| ACAA2 | P42765 | 3-ketoacyl-CoA thiolase, mitochondrial |
| HBB | P68871 | Hemoglobin subunit beta |
| PRSS23 | O95084 | Serine protease 23 |
| GBAS; NIPSNAP2 | O75323 | Protein NipSnap homolog 2 |
| CP | P00450 | Ceruloplasmin |
| EMILIN3 | Q9NT22 | EMILIN-3 |
| LMOD1 | P29536 | Leiomodin-1 |
| TNC | P24821 | Tenascin |
| COL4A6 | Q14031 | Collagen alpha-6(IV) chain |
| IGHM | P01871 | Ig mu chain C region |
| CLEC11A | Q9Y240 | C-type lectin domain family 11 member A |
| C3 | P01024 | Complement C3 |
| LBP | P18428 | Lipopolysaccharide-binding protein |
| KRT6B | P04259 | Keratin, type II cytoskeletal 6B |
| KRT6A | P02538 | Keratin, type II cytoskeletal 6A |
| TMED10 | P49755 | Transmembrane emp24 domain-containing protein 10 |
| COL2A1 | P02458 | Collagen alpha-1(II) chain |
| KPRP | Q5T749 | Keratinocyte proline-rich protein |
| LUM | P51884 | Lumican |
| LRRC59 | Q96AG4 | Leucine-rich repeat-containing protein 59 |
| COL4A5 | P29400 | Collagen alpha-5(IV) chain |
| ANK3 | Q12955 | Ankyrin-3 |
| KRT76 | Q01546 | Keratin, type II cytoskeletal 2 oral |
| NEFL | P07196 | Neurofilament light polypeptide |
| ANXA4 | P09525 | Annexin A4 |
| LRG1 | P02750 | Leucine-rich alpha-2-glycoprotein |
| SERPINC1 | P01008 | Antithrombin-III |
| B2M | P61769 | Beta-2-microglobulin |
| SEMA3C | Q99985 | Semaphorin-3C |
| BGN | P21810 | Biglycan |
| TKT | P29401 | Transketolase |
| SERPINA1 | P01009 | Alpha-1-antitrypsin |
| ATP1A1 | P05023 | Sodium/potassium-transporting ATPase subunit alpha-1 |
| PFKP | Q01813 | ATP-dependent 6-phosphofructokinase, platelet type |
| PIP | P12273 | Prolactin-inducible protein |
| FLG2 | Q5D862 | Filaggrin-2 |
| NDUFA10 | O95299 | NADH dehydrogenase [ubiquinone] 1 alpha subcomplex subunit 10, mitochondrial |
| TGM2 | P21980 | Protein-glutamine gamma-glutamyltransferase 2 |
| CRYGC | P07315 | Gamma-crystallin C |
| DSG1 | Q02413 | Desmoglein-1 |
| LAMC1 | P11047 | Laminin subunit gamma-1 |
| CLEC3B | P05452 | Tetranectin |
| A1BG | P04217 | Alpha-1B-glycoprotein |
| OAF | Q86UD1 | Out at first protein homolog |
| NID2 | Q14112 | Nidogen-2 |
| KRT85 | P78386 | Keratin, type II cuticular Hb5 |
| KRT18 | P05783 | Keratin, type I cytoskeletal 18 |
| CPA3 | P15088 | Mast cell carboxypeptidase A |
| RRAS | P10301 | Ras-related protein R-Ras |
| SERPINB6 | P35237 | Serpin B6 |
| SLC25A5 | P05141 | ADP/ATP translocase 2 |
| UQCRFS1 | P47985 | Cytochrome b-c1 complex subunit Rieske, mitochondrial |
| MDH2 | P40926 | Malate dehydrogenase, mitochondrial |
| DYNC1H1 | Q14204 | Cytoplasmic dynein 1 heavy chain 1 |
| NDUFS6 | O75380 | NADH dehydrogenase [ubiquinone] iron-sulfur protein 6, mitochondrial |
|  | P01717 | Ig lambda chain V-IV region Hil |
| RPN2 | P04844 | Dolichyl-diphosphooligosaccharide--protein glycosyltransferase subunit 2 |
| P4HB | P07237 | Protein disulfide-isomerase |
| APOD | P05090 | Apolipoprotein D |
| TLR6 | Q9Y2C9 | Toll-like receptor 6 |
| AKR1A1 | P14550 | Alcohol dehydrogenase [NADP(+)] |
| PCOLCE | Q15113 | Procollagen C-endopeptidase enhancer 1 |
| IGLL5 | B9A064 | Immunoglobulin lambda-like polypeptide 5 |
| SDCBP | O00560 | Syntenin-1 |
| CD34 | P28906 | Hematopoietic progenitor cell antigen CD34 |
| PHB2 | Q99623 | Prohibitin-2 |
| CHST14 | Q8NCH0 | Carbohydrate sulfotransferase 14 |
| LAMB2 | P55268 | Laminin subunit beta-2 |
| SERPINB5 | P36952 | Serpin B5 |
| VDAC2 | P45880 | Voltage-dependent anion-selective channel protein 2 |
| FBLN5 | Q9UBX5 | Fibulin-5 |
| TAGLN | Q01995 | Transgelin |
| ATP5J2 | P56134 | ATP synthase subunit f, mitochondrial |
| MYH11 | P35749 | Myosin-11 |
| GNG12 | Q9UBI6 | Guanine nucleotide-binding protein G(I)/G(S)/G(O) subunit gamma-12 |
| PRDX5 | P30044 | Peroxiredoxin-5, mitochondrial |
| CHST5 | Q9GZS9 | Carbohydrate sulfotransferase 5 |

POAG-Primary open angle glaucoma

PACG-Primary angle closure glaucoma

TM-Trabecular meshwork

IOP-Intraocular pressure

Supplementary Materials:

Supplemental Methods and Appendix of abbreviations

The mass spectrometry proteomics data have been deposited to the ProteomeXchange Consortium via the PRIDE partner repository with the dataset identifier PXD010752 and Submission Reference: 1-20180810-113504.

Legends:

Figure S1: Protein profiling according to cellular localization (A), molecular functions (B) and biological process (C) of proteins in the trabecular meshwork of patients with glaucoma. D, Fold change of key autophagy and apoptosis markers. E, related proteins in ex-vivo dissected trabecular meshwork specimens of patients with severe primary adult glaucoma

Figure S2: Fold change of 59 significantly differentially expressed proteins in POAG and PACG in the trabecular meshwork.

Fig S3: FACS analysis of PBMC in controls (A) versus patients with POAG (B) and PACG (C) with bar graph (D) showing percentage of total apoptotic cells.

Figure S4: Relative gene expression of autophagy genes in PBMC of patients with moderate (A) and severe POAG (B), moderate PACG (C) and severe PACG compared to apoptosis genes in Moderate POAG (E) and severe POAG (F) or moderate/severe PACG (G). Relative gene expression of necrosis genes (H, I) in PBMC in moderate and severe glaucoma. J, K-Significant post-translational modifications in the PBMC in patients with moderate/severe POAG or PACG.

Figure S5: A-fold change of myocilin after 10nM dexamethasone treatment of HTM cells. B-Bright field microscopic examination of HTM cells after 10nM of dexamethasone treatment. C-gating of cell population of FACS analysis in HTM cells.

*Supplemental methods and Appendix*


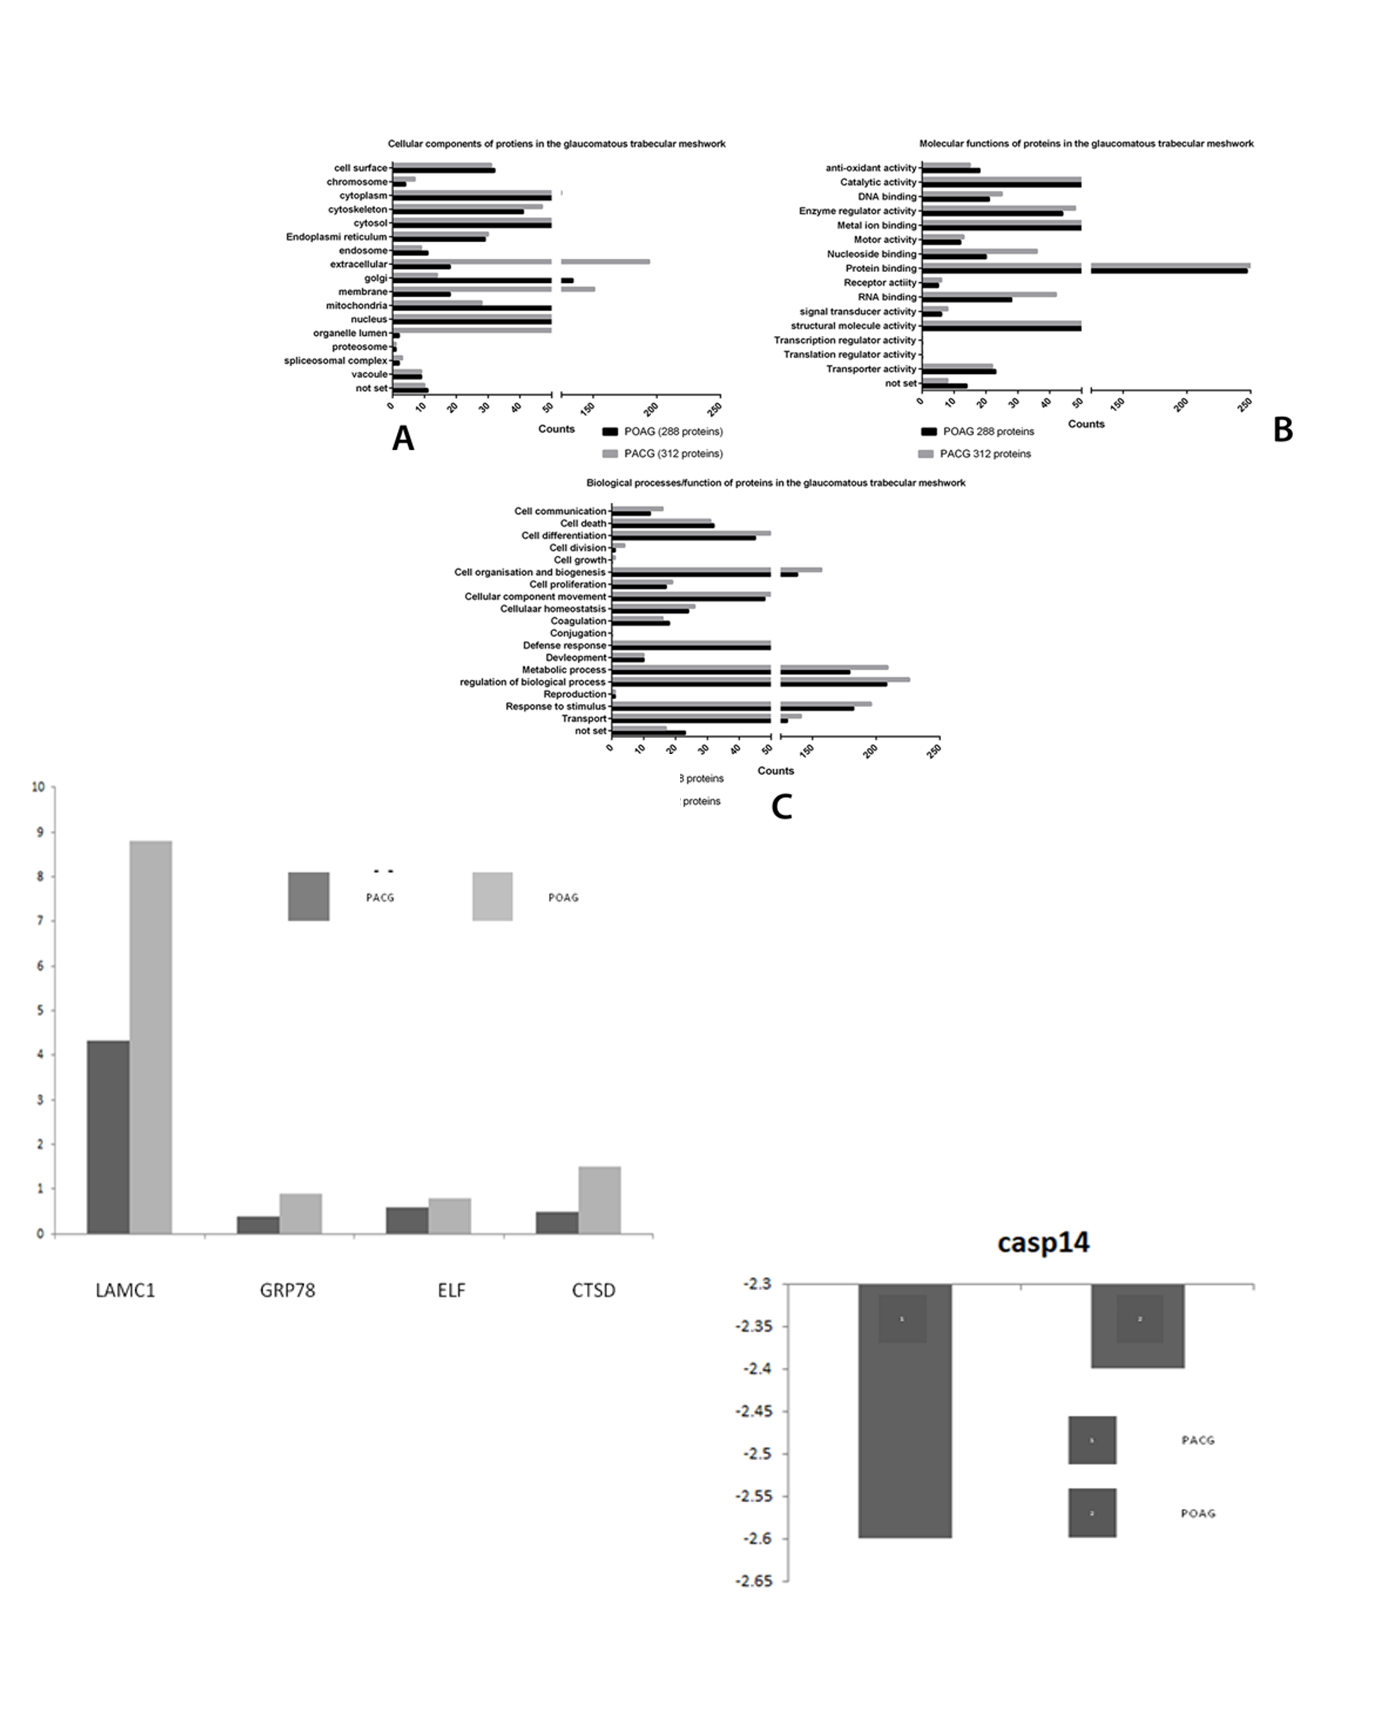

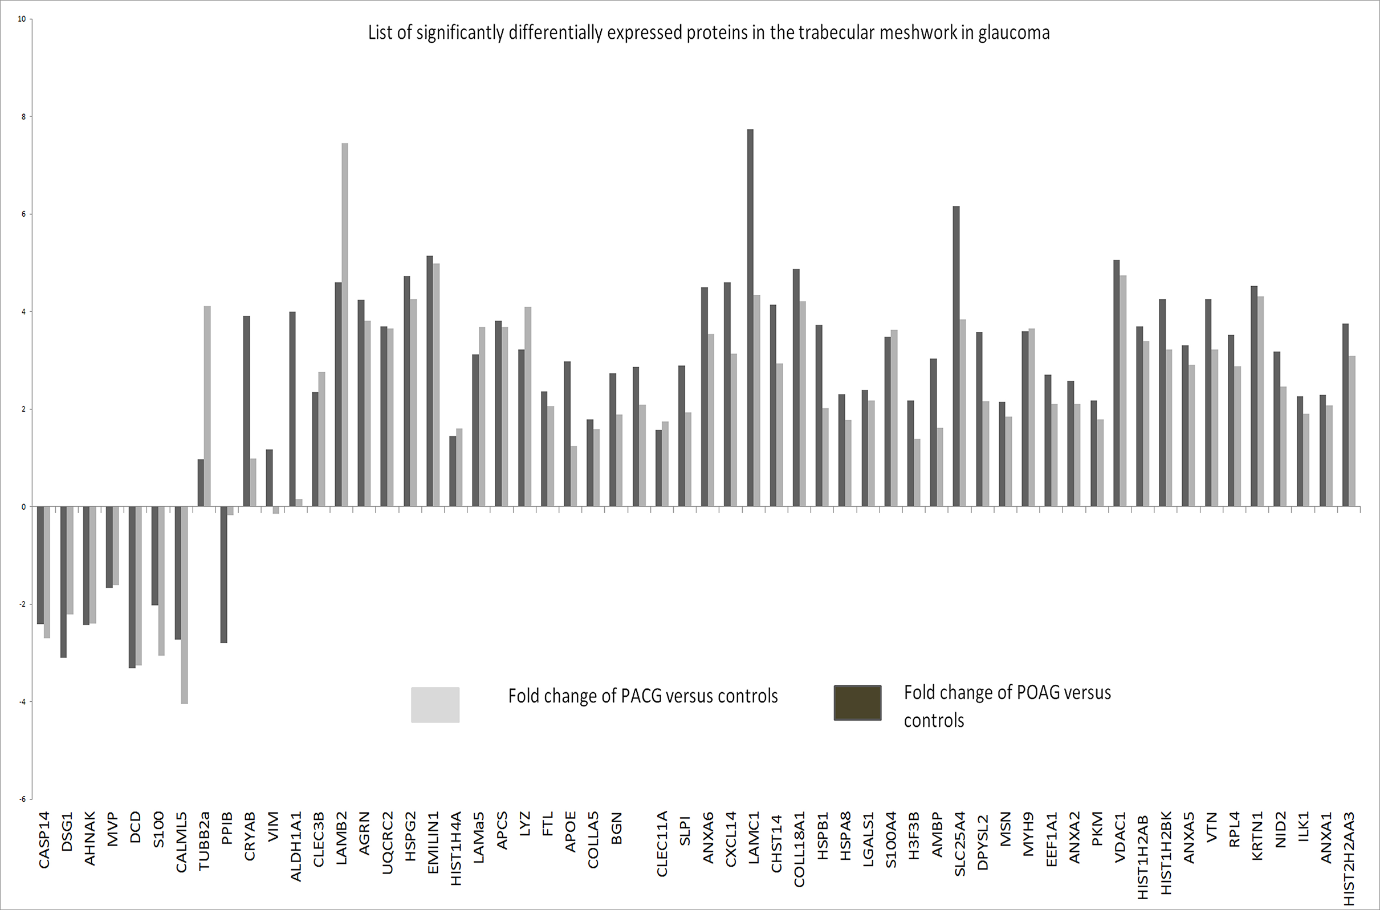

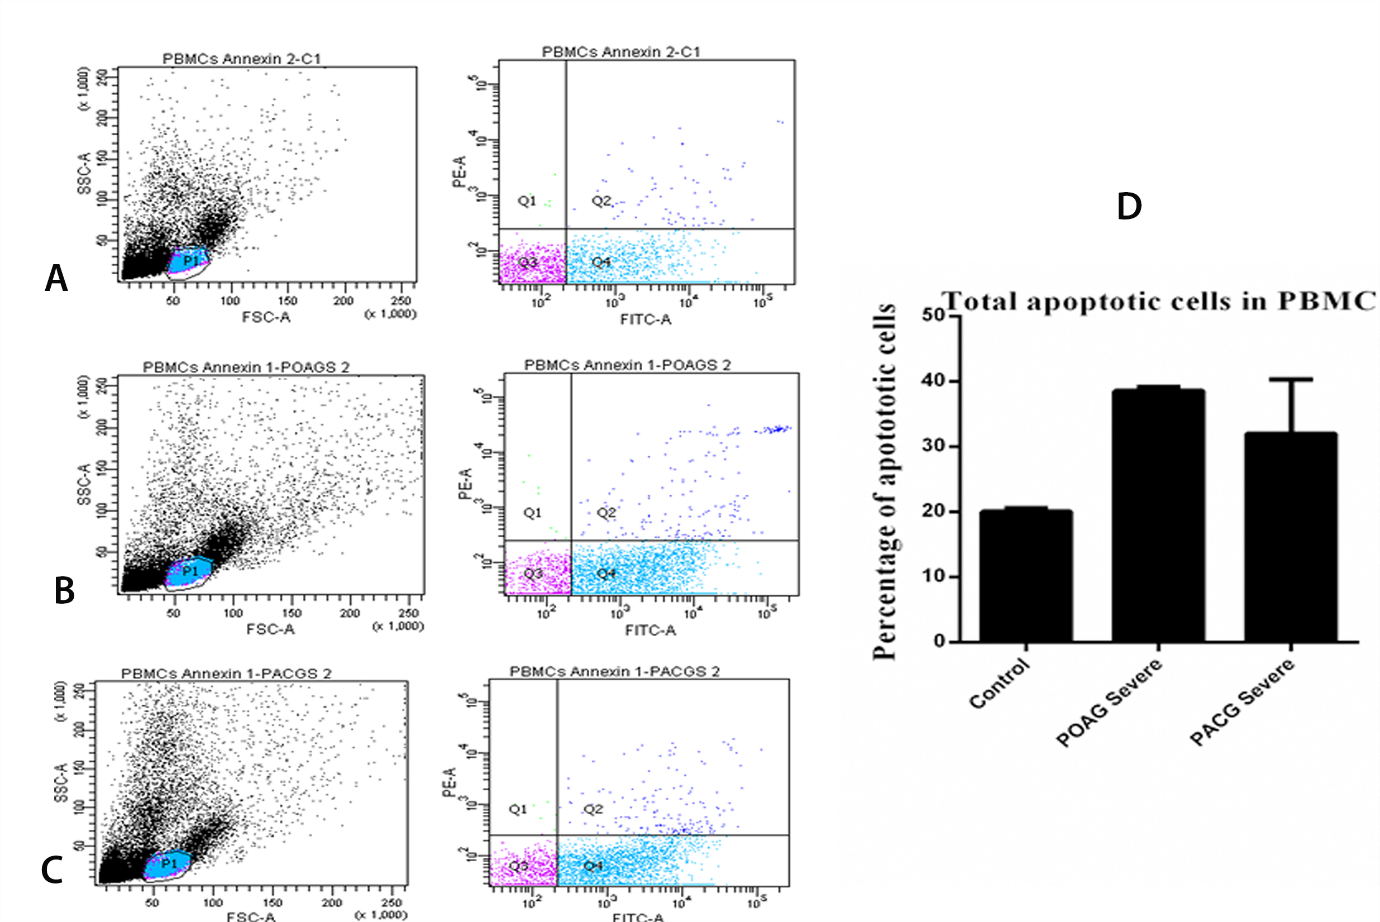

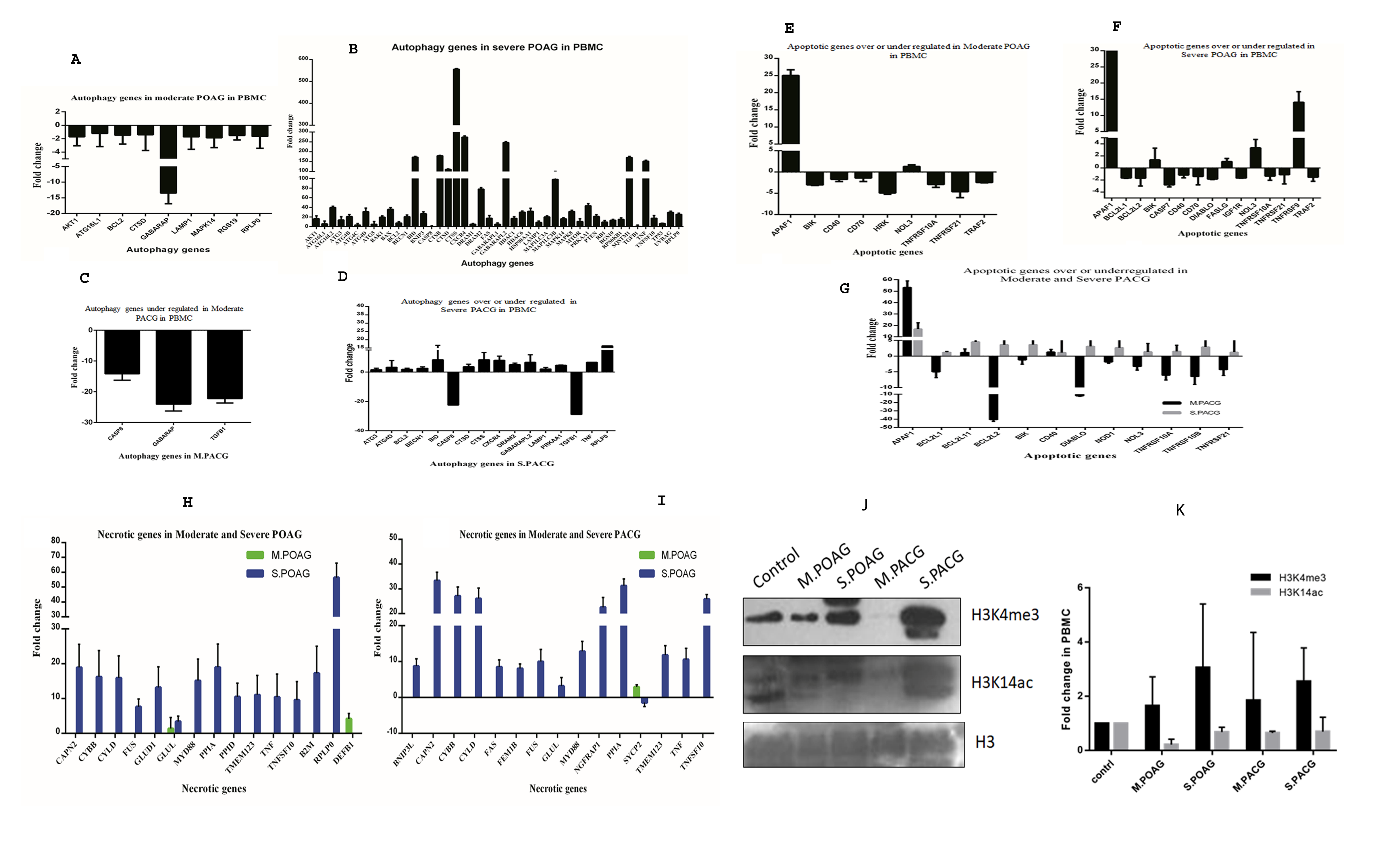


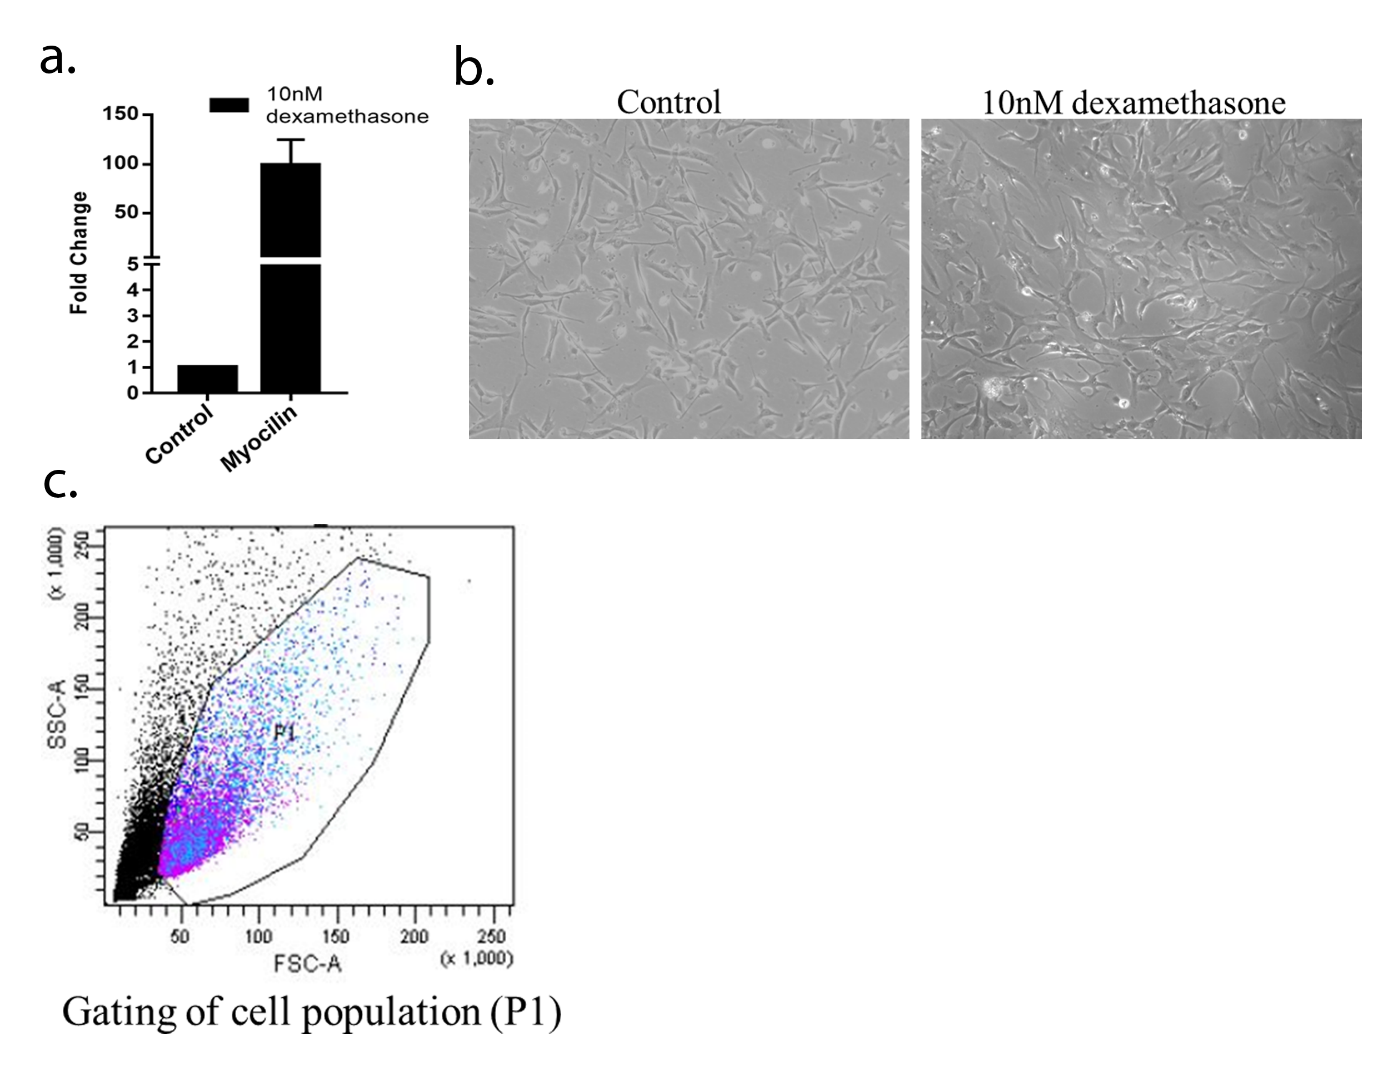

Supplement: Supplementary file 1 [file get_supplementary_file.php]
